# Supplementary material for: CD4+CD25-Foxp3+ T cells: a marker for lupus nephritis?
Source: PubMed Central journal article supplement (PMC4060257; doi:10.1186/ar4553), 2014-04-28

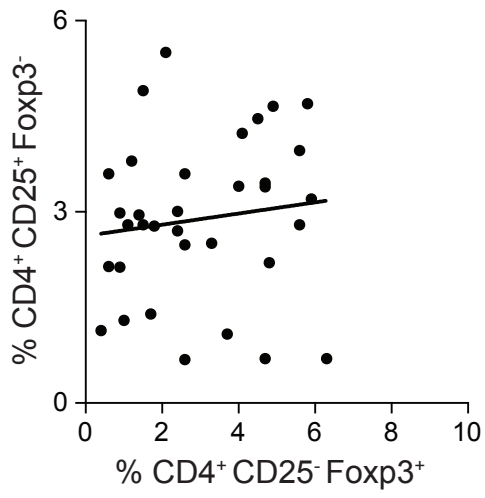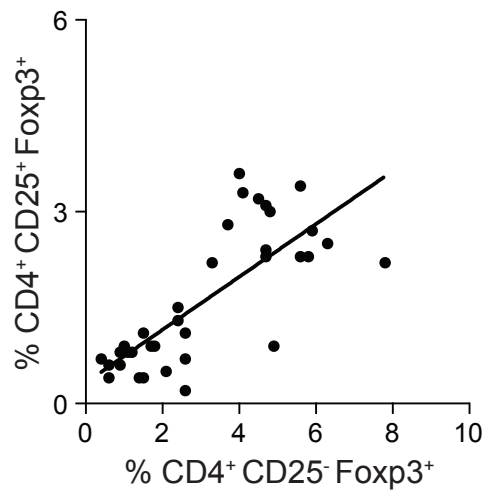

Supplement: ar4553-S1.pdf [file ar4553-S1.pdf]
